# Supplementary material
Source: PubMed Central journal article supplement (PMC3999283)
Supplement: NIHMS561279-supplement-Supp_Fig_S1.pdf [file NIHMS561279-supplement-Supp_Fig_S1.pdf]

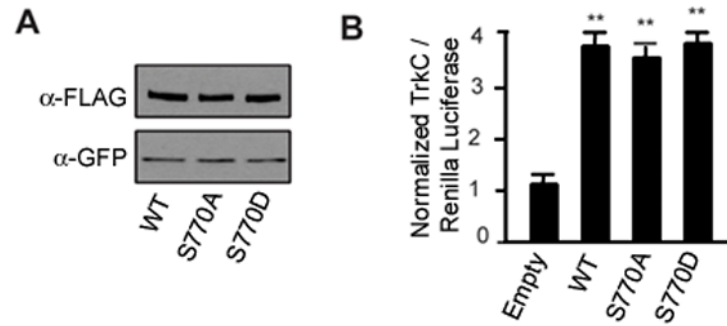

**Figure S1. Sp4 S770 mutants are expressed and are able to activate a reporter gene**

**A.** CG neurons were transfected with GFP and FLAG-Sp4 wild-type (WT), S770A, or S770D point mutants and protein expression was analyzed by Western blot. Results are a representative immunoblot from an experiment performed at least 3 times. GFP serves as a loading control for transfected cells. **B.** 293T cells were cotransfected with FLAG-Sp4 wild-type, S770A, or S770D point mutants along with a TrkC-luciferase reporter and a renilla-luciferase control. After 24 hours, cells were assayed for luciferase activity. N=3, \*\*p<0.01, n.s., not significant, ANOVA (F=72.99; p<0.0001).
